# Supplementary material
Source: publisher site journal article supplement (https://www.dovepress.com/article/338055)
Supplement: Supplementary file 1 [file get_supplementary_file.php]

**Figure S1 All compounds of 4 herbs from Li-Da-Qian mixture**

**
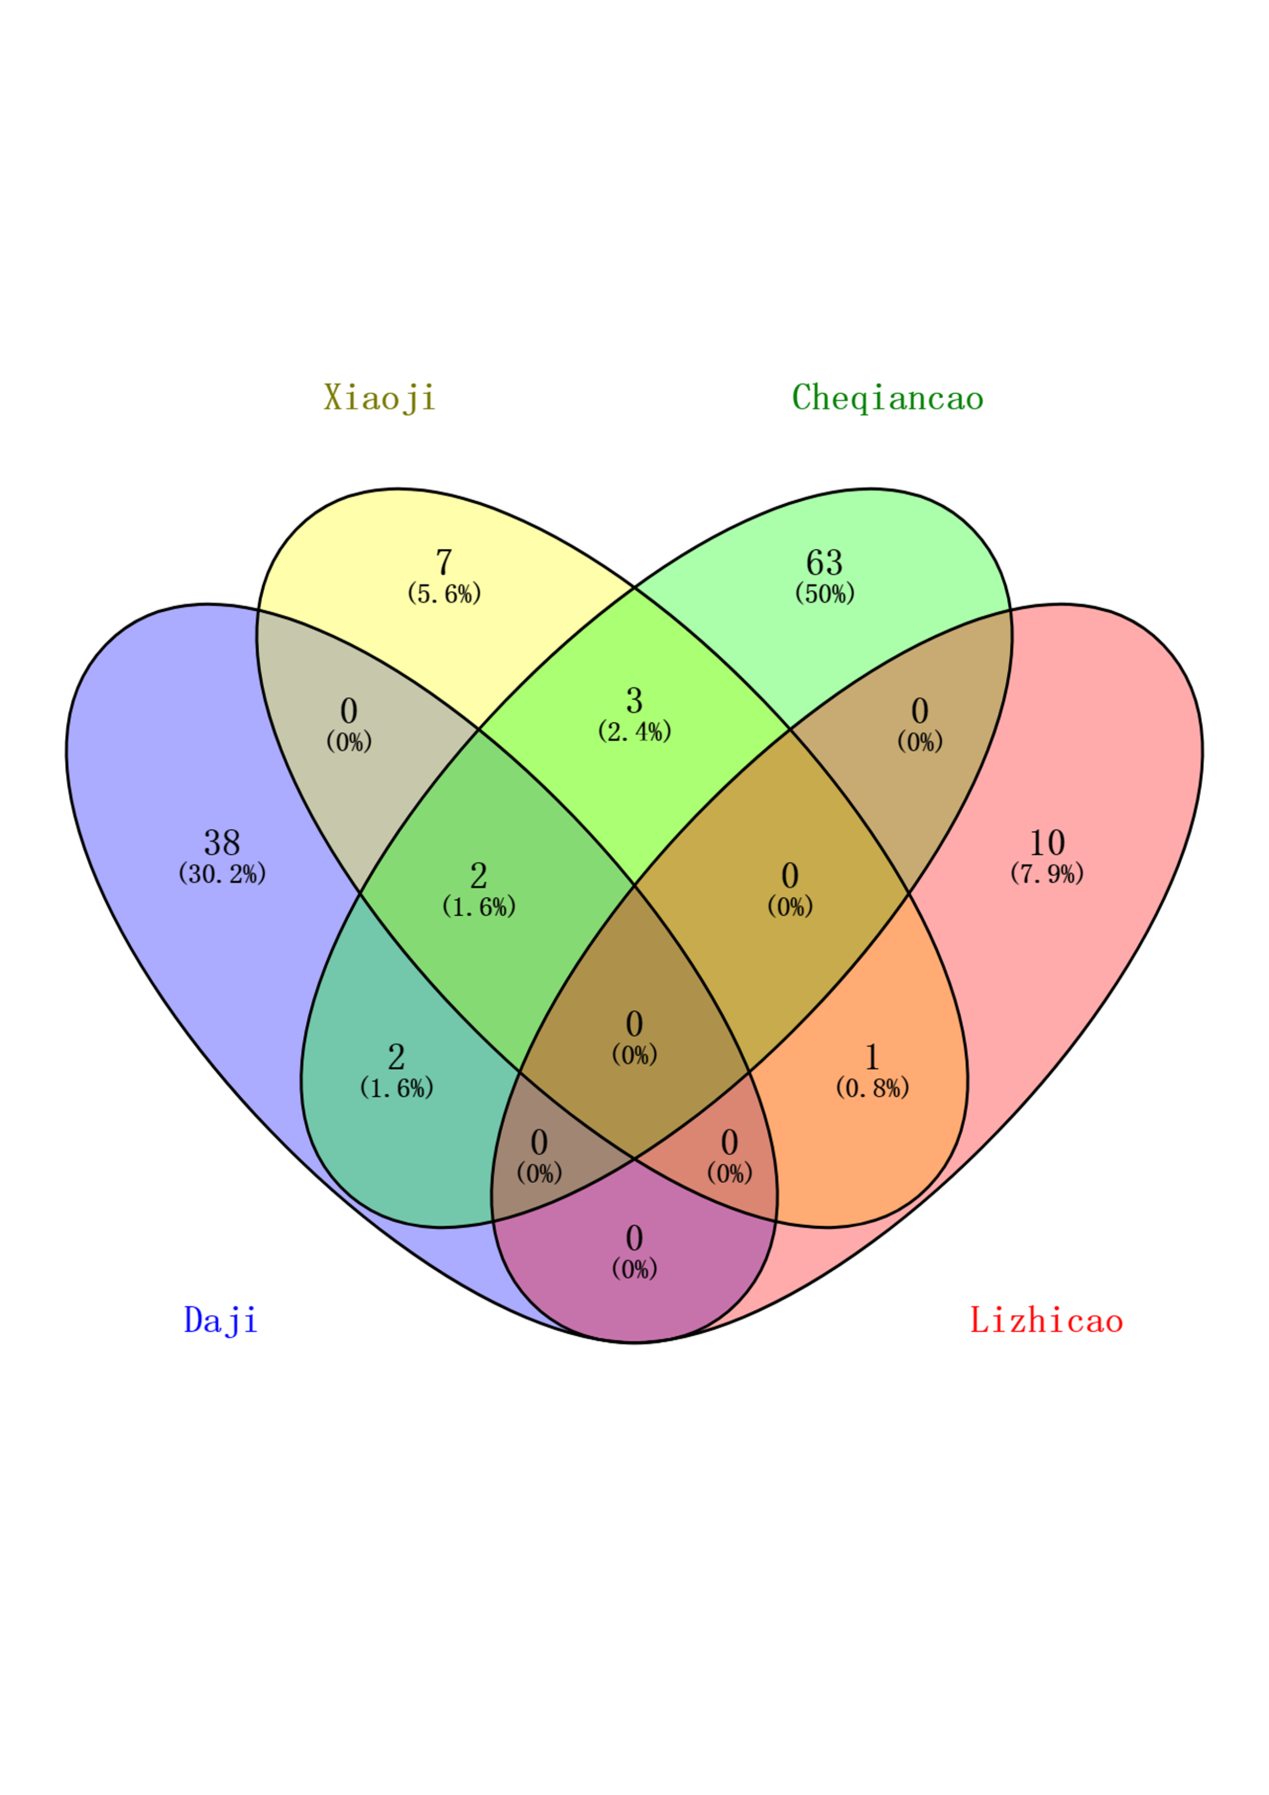
**

**Figure S2 The intersection of glomerulonephritis targets and Li-Da-Qian targets**

**
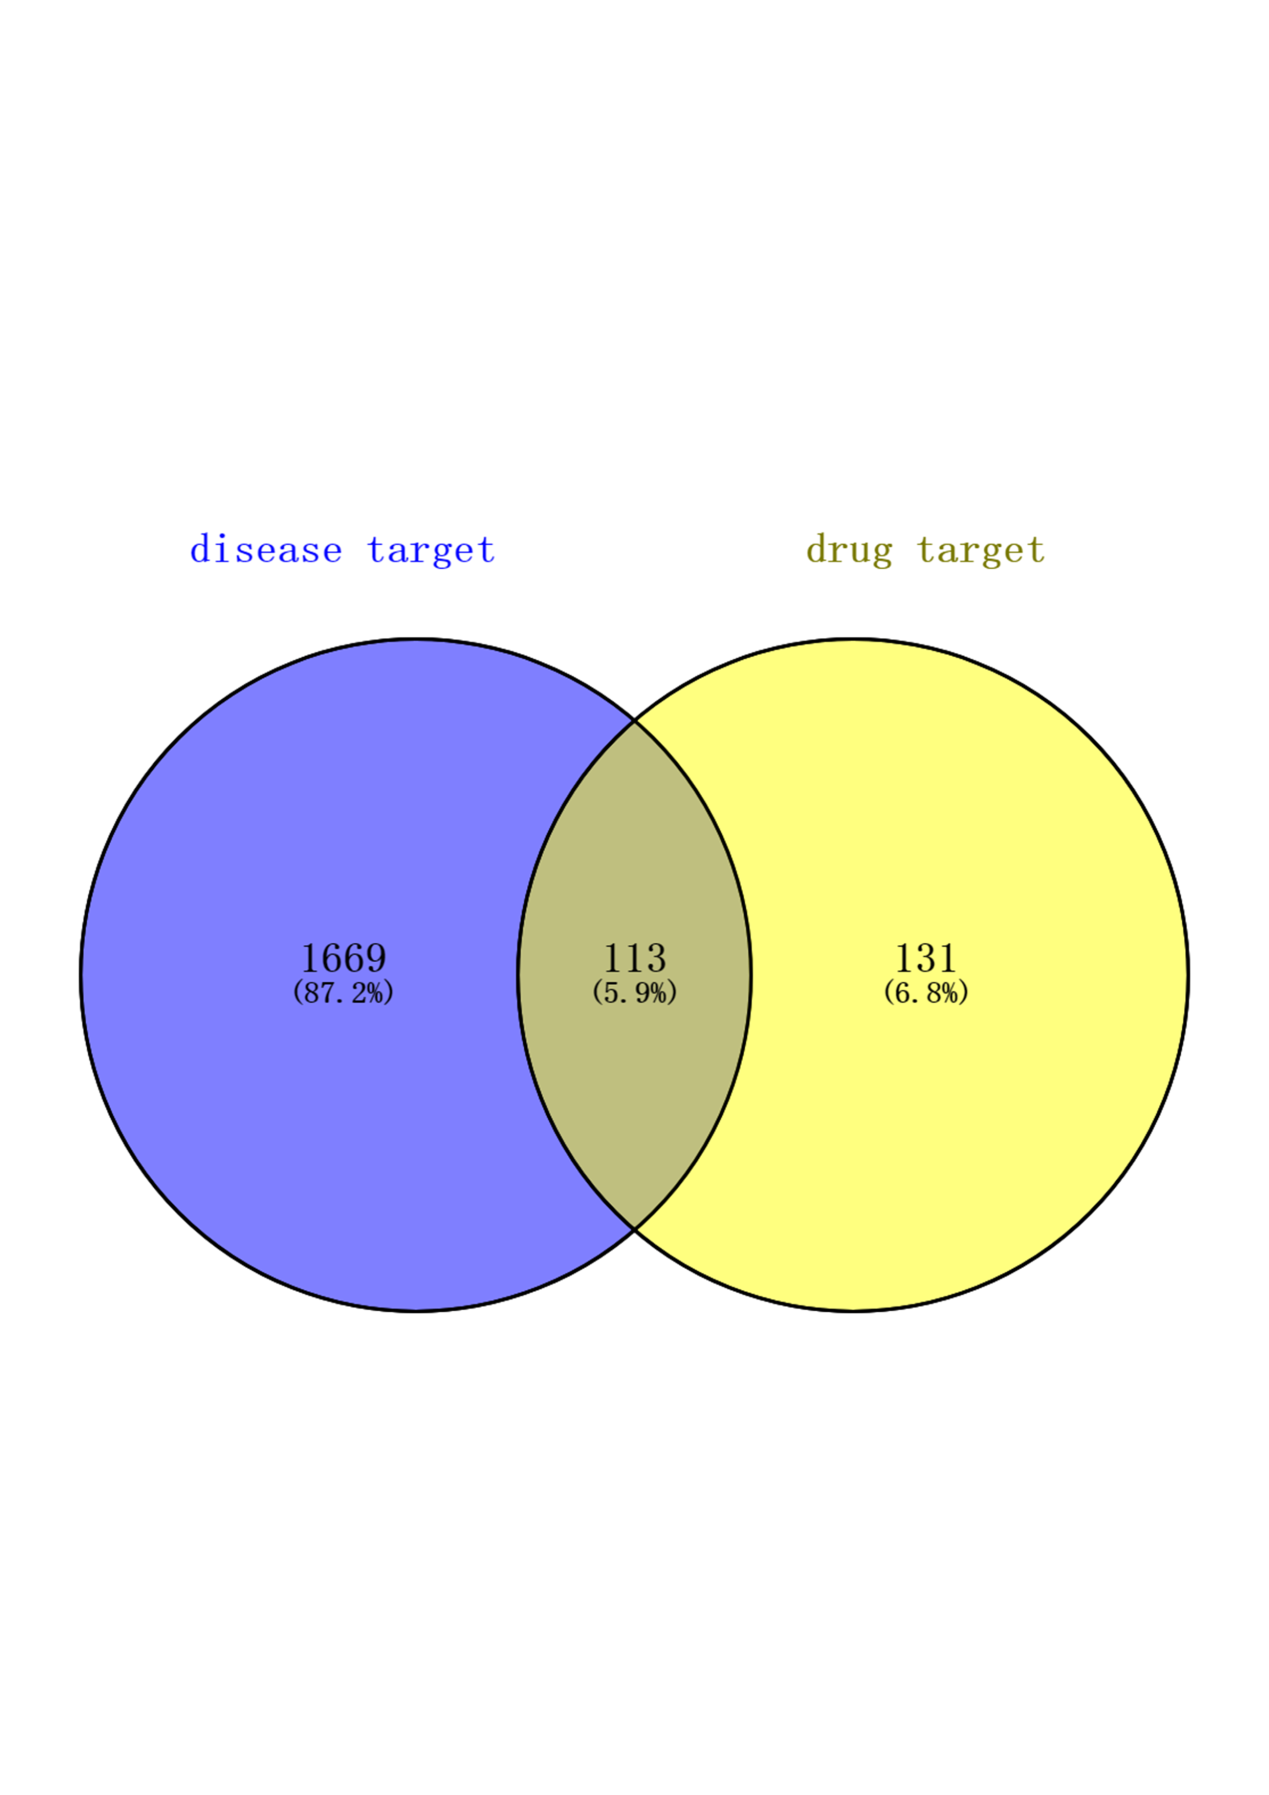
**

**Figure S3.1 Virtual 3D docking of bioactive ingredients from Li-Da-Qian mixture for glomerulonephritis targets.**

**
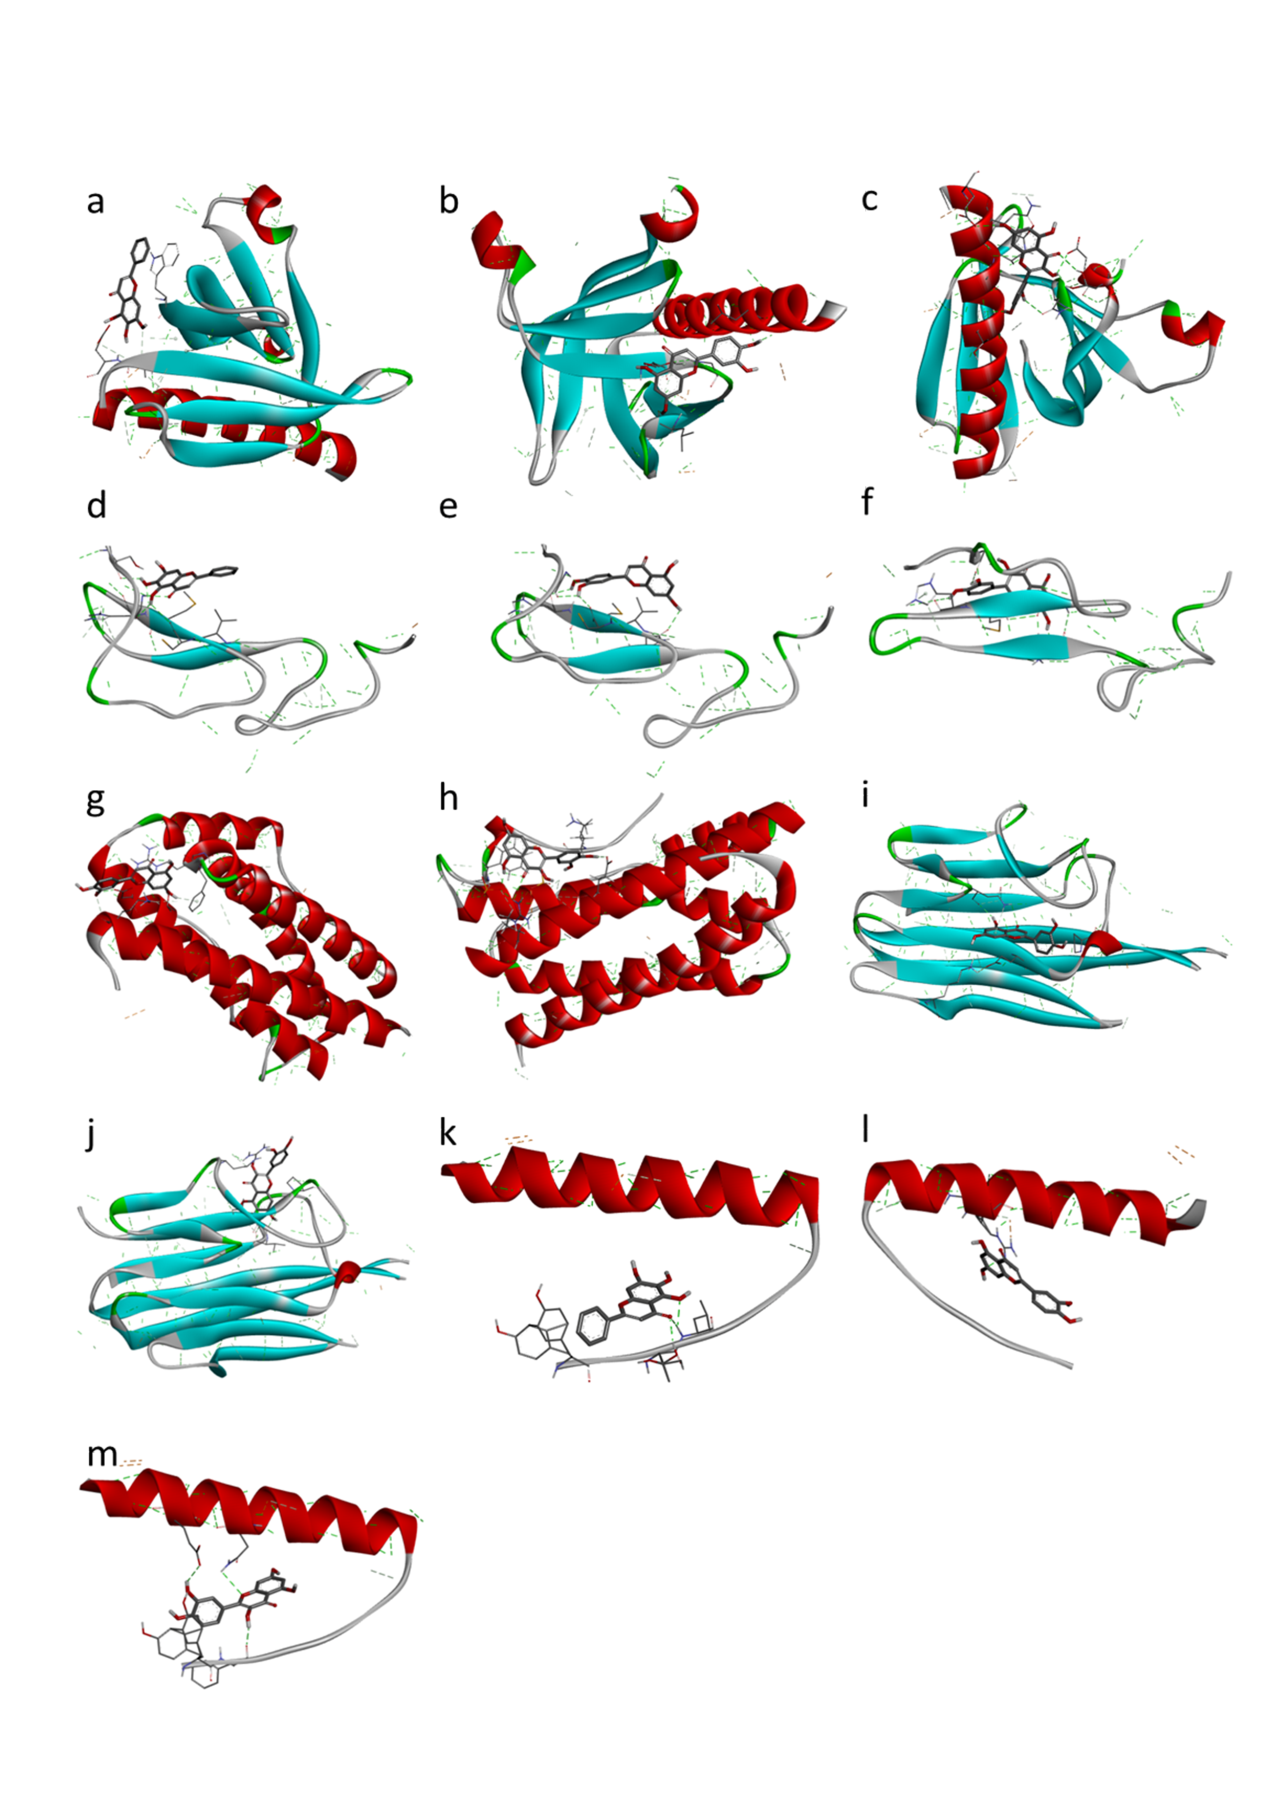
**

**Figure S3.2 Virtual 2D docking of bioactive ingredients from Li-Da-Qian mixture for glomerulonephritis targets.**

**
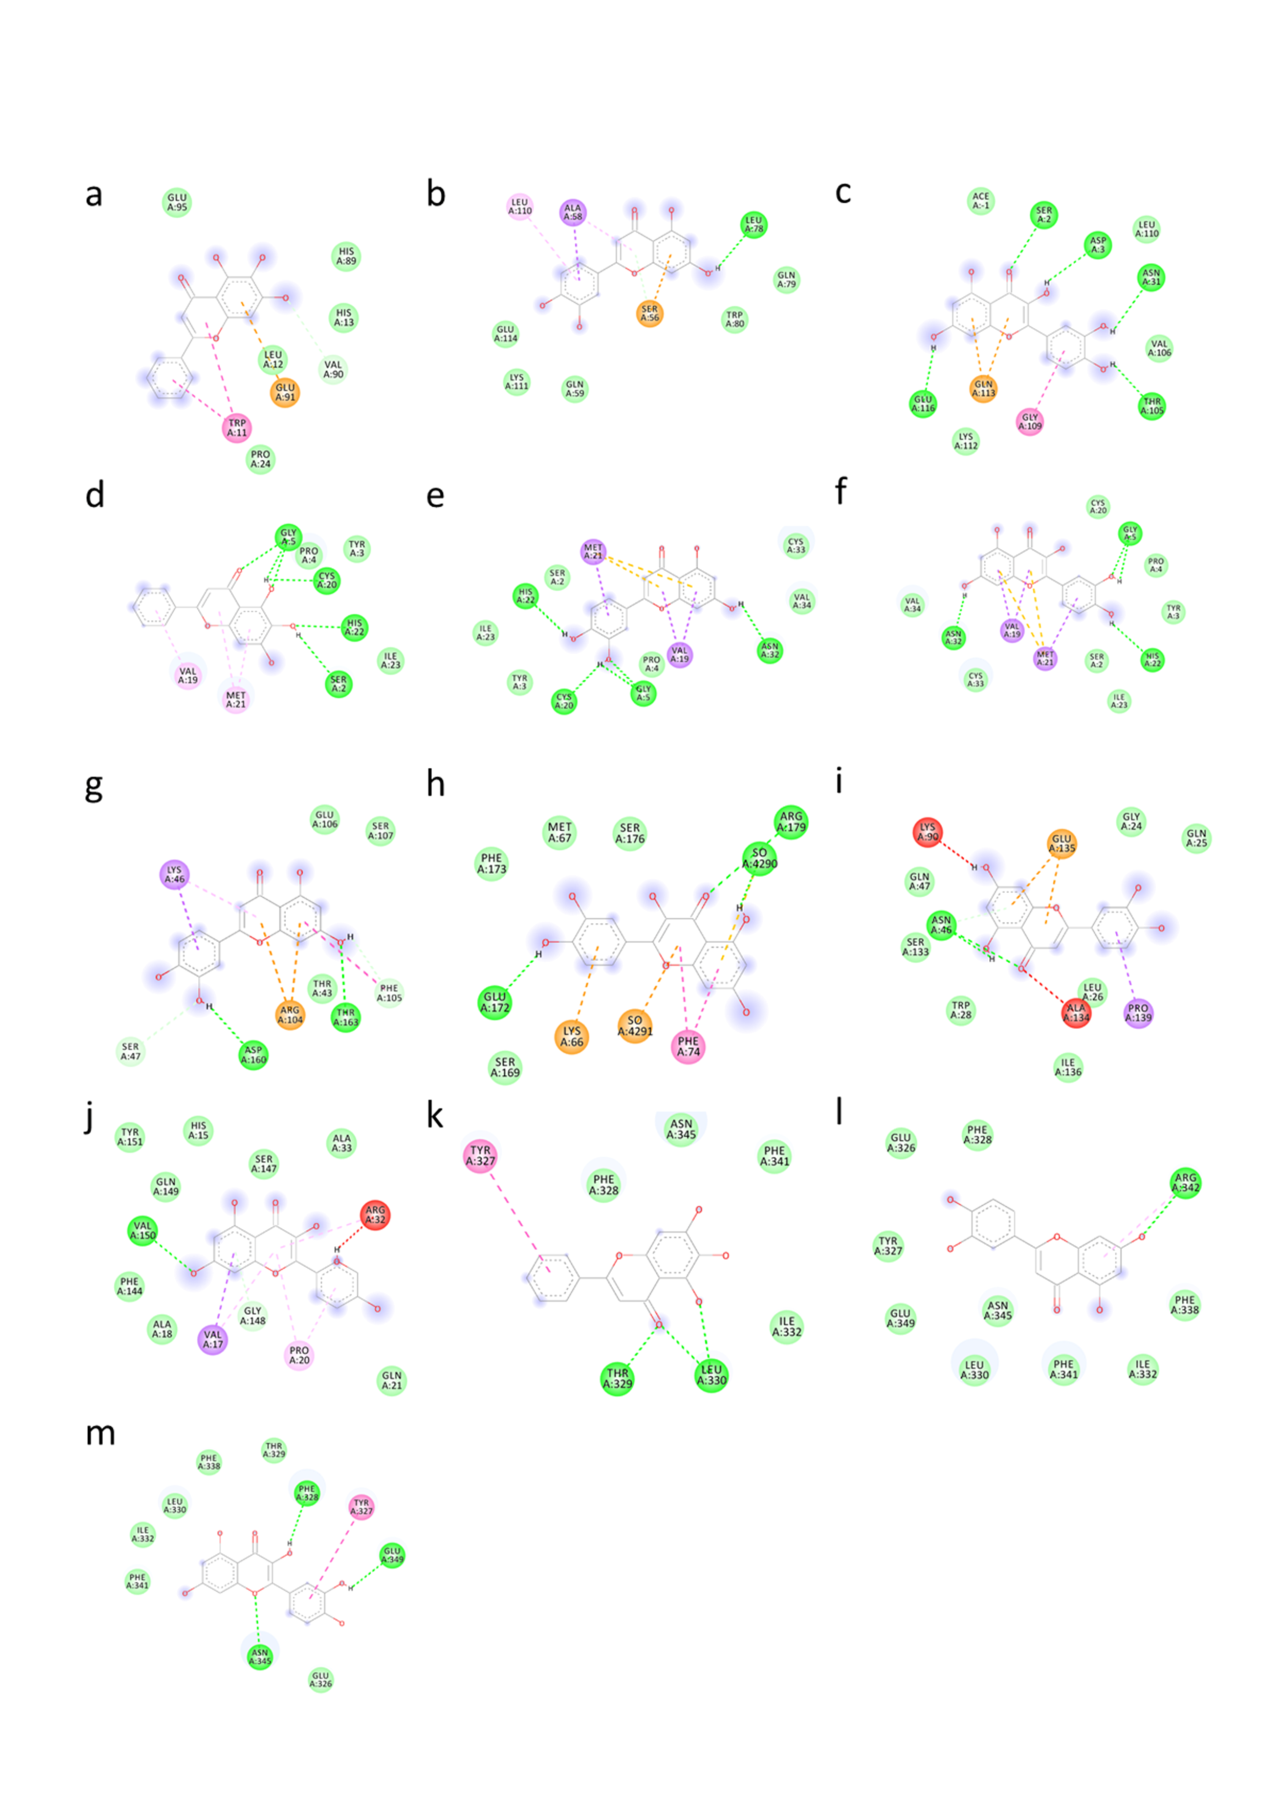
**

# **Figure S4 Cell viability CCK8 assay in mesangial cells stimulated by luteolin**

**

**

**TableS1 Active compounds of Li-Da-Qian mixture**

| Mol ID | Molecule Name | MW | OB (%) | DL | Source |
| --- | --- | --- | --- | --- | --- |
| MOL001735 | Dinatin | 300.28 | 30.97 | 0.27 | TCMSP |
| MOL001749 | ZINC03860434 | 390.62 | 43.59 | 0.35 | TCMSP |
| MOL002032 | DNOP | 390.62 | 40.59 | 0.4 | TCMSP |
| MOL002879 | Diop | 390.62 | 43.59 | 0.39 | TCMSP |
| MOL003344 | β-amyrin acetate | 468.84 | 42.06 | 0.74 | TCMSP |
| MOL000359 | Sitosterol | 414.79 | 36.91 | 0.75 | TCMSP |
| MOL000449 | Stigmasterol | 412.77 | 43.83 | 0.76 | TCMSP |
| MOL005842 | Pectolinarigenin | 314.31 | 41.17 | 0.3 | TCMSP |
| MOL005846 | Pectolinarin | 622.63 | 47.62 | 0.65 | TCMSP |
| MOL000596 | [(3S,4aR,6aR,6aR,6bR,8aR,12S,12aR,14aR,14bR)-4,4,6a,6b,8a,12,14b-heptamethyl-11-methylene-1,2,3,4a,5,6,6a,7,8,9,10,12,12a,13,14,14a-hexadecahydropicen-3-yl] acetate | 468.84 | 43.08 | 0.74 | TCMSP |
| MOL000098 | Quercetin | 302.25 | 46.43 | 0.28 | TCMSP |
| MOL001689 | Acacetin | 284.28 | 34.97 | 0.24 | TCMSP |
| MOL001790 | Linarin | 592.6 | 39.84 | 0.71 | TCMSP |
| MOL002714 | Baicalein | 270.25 | 33.52 | 0.21 | TCMSP |
| MOL002776 | Baicalin | 446.39 | 40.12 | 0.75 | TCMSP |
| MOL004004 | 6-OH-Luteolin | 302.25 | 46.93 | 0.28 | TCMSP |
| MOL000006 | Luteolin | 286.25 | 36.16 | 0.25 | TCMSP |
| MOL007783 | Melampyroside | 450.48 | 57.5 | 0.8 | TCMSP |
| MOL007796 | stigmasteryl palmitate | 651.23 | 38.09 | 0.4 | TCMSP |
| MOL007799 | β-sitosteryl palmitate | 653.25 | 30.91 | 0.4 | TCMSP |

**Table S2 Potential targets of Li-Da-Qian mixture**

| No. | Gene | No. | Gene | No. | Gene | No. | Gene | No. | Gene |
| --- | --- | --- | --- | --- | --- | --- | --- | --- | --- |
| 1 | PGR | 61 | MMP2 | 121 | MPO | 181 | NFATC1 | 241 | SLC5A2 |
| 2 | NCOA2 | 62 | MMP9 | 122 | TOP2A | 182 | TDRD7 | 242 | SLC5A1 |
| 3 | NR3C2 | 63 | MAPK1 | 123 | NCF1 | 183 | EGLN1 | 243 | CTRC |
| 4 | ADH1C | 64 | IL10 | 124 | ABCG2 | 184 | NOX5 | 244 | SRD5A1 |
| 5 | RXRA | 65 | EGF | 125 | HAS2 | 185 | FABP5 |  |  |
| 6 | NCOA1 | 66 | RB1 | 126 | GSTP1 | 186 | APOD |  |  |
| 7 | PTGS1 | 67 | TNF | 127 | NFE2L2 | 187 | IGHG1 |  |  |
| 8 | PTGS2 | 68 | JUN | 128 | NQO1 | 188 | PRKACA |  |  |
| 9 | ADRA2A | 69 | IL6 | 129 | PARP1 | 189 | GABRA3 |  |  |
| 10 | SLC6A2 | 70 | AHSA1 | 130 | AHR | 190 | CHRNA7 |  |  |
| 11 | SLC6A3 | 71 | ELK1 | 131 | PSMD3 | 191 | F2 |  |  |
| 12 | ADRB2 | 72 | NFKBIA | 132 | SLC2A4 | 192 | CALM |  |  |
| 13 | AKR1B1 | 73 | POR | 133 | COL3A1 | 193 | PIK3CG |  |  |
| 14 | PLAU | 74 | ODC1 | 134 | CXCL11 | 194 | FHUA |  |  |
| 15 | LTA4H | 75 | XDH | 135 | CXCL2 | 195 | TOP2 |  |  |
| 16 | MAOB | 76 | TOP1 | 136 | DCAF5 | 196 | CDKN2A |  |  |
| 17 | MAOA | 77 | SOD1 | 137 | NR1I3 | 197 | RAF1 |  |  |
| 18 | CTRB1 | 78 | PRKCA | 138 | CHEK2 | 198 | HERC5 |  |  |
| 19 | CHRM3 | 79 | MMP1 | 139 | INSR | 199 | PTEN |  |  |
| 20 | CHRM1 | 80 | HIF1A | 140 | CLDN4 | 200 | GYRB |  |  |
| 21 | ADRB1 | 81 | STAT1 | 141 | PPARA | 201 | APP |  |  |
| 22 | SCN5A | 82 | RUNX1T1 | 142 | PPARD | 202 | PTPN1 |  |  |
| 23 | HTR2A | 83 | CDK1 | 143 | HSF1 | 203 | CES2 |  |  |
| 24 | ADRA1A | 84 | HSPA5 | 144 | CRP | 204 | HSD11B1 |  |  |
| 25 | CHRM2 | 85 | ERBB2 | 145 | CXCL10 | 205 | HSD11B2 |  |  |
| 26 | ADRA1B | 86 | ACACA | 146 | CHUK | 206 | FAAH |  |  |
| 27 | GABRA1 | 87 | HMOX1 | 147 | SPP1 | 207 | CYP17A1 |  |  |
| 28 | NOS2 | 88 | CYP3A4 | 148 | RUNX2 | 208 | TAS2R31 |  |  |
| 29 | DPP4 | 89 | CYP1A2 | 149 | RASSF1 | 209 | HMGCR |  |  |
| 30 | HSP90AA1 | 90 | CAV1 | 150 | E2F1 | 210 | PTPN2 |  |  |
| 31 | PRSS1 | 91 | MYC | 151 | E2F2 | 211 | AKR1C2 |  |  |
| 32 | ACHE | 92 | F3 | 152 | ACPP | 212 | AKR1C1 |  |  |
| 33 | RHO | 93 | GJA1 | 153 | CTSD | 213 | NR3C1 |  |  |
| 34 | AR | 94 | CYP1A1 | 154 | IGFBP3 | 214 | HSD17B2 |  |  |
| 35 | CDK2 | 95 | ICAM1 | 155 | IGF2 | 215 | PREP |  |  |
| 36 | CHEK1 | 96 | IL1B | 156 | CD40LG | 216 | ATP12A |  |  |
| 37 | PDE3A | 97 | CCL2 | 157 | IRF1 | 217 | CYP2C19 |  |  |
| 38 | RELA | 98 | SELE | 158 | ERBB3 | 218 | EPAS1 |  |  |
| 39 | BCL2 | 99 | VCAM1 | 159 | PON1 | 219 | AKR1C3 |  |  |
| 40 | CDKN1A | 100 | PTGER3 | 160 | DIO1 | 220 | NR1H3 |  |  |
| 41 | BAX | 101 | CXCL8 | 161 | PCOLCE | 221 | NR1H2 |  |  |
| 42 | CASP3 | 102 | PRKCB | 162 | NPEPPS | 222 | MTTP |  |  |
| 43 | TP53 | 103 | BIRC5 | 163 | HK2 | 223 | APOB |  |  |
| 44 | CASP8 | 104 | DUOX2 | 164 | NKX3-1 | 224 | C5AR1 |  |  |
| 45 | FASN | 105 | NOS3 | 165 | CDK4 | 225 | TACR1 |  |  |
| 46 | FASLG | 106 | HSPB1 | 166 | MDM2 | 226 | SHBG |  |  |
| 47 | CYP19A1 | 107 | TGFB1 | 167 | PCNA | 227 | CNR1 |  |  |
| 48 | PPARG | 108 | SULT1E1 | 168 | CASP7 | 228 | CNR2 |  |  |
| 49 | KCNH2 | 109 | MGAM | 169 | MCL1 | 229 | SQLE |  |  |
| 50 | F10 | 110 | IL2 | 170 | TYR | 230 | LIMK2 |  |  |
| 51 | MMP3 | 111 | NR1I2 | 171 | IL4 | 231 | MAPK14 |  |  |
| 52 | F7 | 112 | CYP1B1 | 172 | XIAP | 232 | SERPINA6 |  |  |
| 53 | EGFR | 113 | CCNB1 | 173 | PTGES | 233 | FNTA |  |  |
| 54 | AKT1 | 114 | PLAT | 174 | NUF2 | 234 | FNTB |  |  |
| 55 | VEGFA | 115 | THBD | 175 | ADCY2 | 235 | ADORA1 |  |  |
| 56 | CCND1 | 116 | SERPINE1 | 176 | MET | 236 | ADORA2A |  |  |
| 57 | BCL2L1 | 117 | COL1A1 | 177 | FOSL1 | 237 | ADORA3 |  |  |
| 58 | FOS | 118 | IFNG | 178 | FOSL2 | 238 | SLC29A1 |  |  |
| 59 | EIF6 | 119 | ALOX5 | 179 | CYCS | 239 | MME |  |  |
| 60 | CASP9 | 120 | IL1A | 180 | ALOX12 | 240 | MAP2K1 |  |  |

| Table S3 The intersection of glomerulonephritis targets and Li-Da-Qian mixture targets | | |
| --- | --- | --- |
| disease target | drug target | repeated target |
| CFH | PGR | MPO |
| CFHR5 | NCOA2 | CD40LG |
| C3 | NR3C2 | ICAM1 |
| PRTN3 | ADH1C | IL10 |
| COL4A3 | RXRA | TNF |
| DGKE | NCOA1 | CCL2 |
| CFI | PTGS1 | SPP1 |
| COL4A4 | PTGS2 | VCAM1 |
| C4A | ADRA2A | TGFB1 |
| C1QC | SLC6A2 | MME |
| C1QA | SLC6A3 | IL6 |
| C1QB | ADRB2 | CRP |
| ALB | AKR1B1 | IL1B |
| CFHR1 | PLAU | FASLG |
| HLA-DRB1 | LTA4H | PON1 |
| CD79A | MAOB | SELE |
| COL4A5 | MAOA | IL4 |
| MPO | CTRB1 | SERPINE1 |
| SOX18 | CHRM3 | MAPK1 |
| CD40LG | CHRM1 | IFNG |
| ITGB2 | ADRB1 | NOS2 |
| NPHS1 | SCN5A | VEGFA |
| PLA2R1 | HTR2A | IL2 |
| FN1 | ADRA1A | C5AR1 |
| ICAM1 | CHRM2 | AKR1B1 |
| C4B | ADRA1B | ALOX5 |
| APOL1 | GABRA1 | CXCL8 |
| IL10 | NOS2 | NOS3 |
| FCGR2A | DPP4 | THBD |
| CFP | HSP90AA1 | CXCL10 |
| CFHR2 | PRSS1 | PTEN |
| LMNB2 | ACHE | MMP1 |
| FCGR2B | RHO | EGF |
| TNF | AR | MMP2 |
| ACE | CDK2 | HMOX1 |
| CCL2 | CHEK1 | HSP90AA1 |
| NPHS2 | PDE3A | MMP9 |
| CD46 | RELA | F3 |
| CFB | BCL2 | F2 |
| MBL2 | CDKN1A | CASP8 |
| INF2 | BAX | TP53 |
| SPP1 | CASP3 | IL1A |
| VCAM1 | TP53 | SOD1 |
| CTLA4 | CASP8 | BCL2 |
| TGFB1 | FASN | STAT1 |
| MME | FASLG | MMP3 |
| ITGAL | CYP19A1 | CASP3 |
| C1S | PPARG | PLAU |
| FAS | KCNH2 | CXCL11 |
| IL6 | F10 | JUN |
| SYNPO | MMP3 | AKT1 |
| WT1 | F7 | NR3C1 |
| CCR5 | EGFR | COL1A1 |
| CCR6 | AKT1 | KCNH2 |
| AGTR1 | VEGFA | CHRM3 |
| CD4 | CCND1 | PIK3CG |
| CRP | BCL2L1 | IRF1 |
| C5 | FOS | CYP2C19 |
| PIGN | EIF6 | CYP1A2 |
| PGM3 | CASP9 | PRSS1 |
| CR1 | MMP2 | PCNA |
| ELANE | MMP9 | HIF1A |
| IFNA1 | MAPK1 | PLAT |
| IL1B | IL10 | PTGS2 |
| MASP1 | EGF | HSPA5 |
| EDN1 | RB1 | APOB |
| CD19 | TNF | PARP1 |
| MBNP | JUN | PTGS1 |
| FASLG | IL6 | INSR |
| C4BPA | AHSA1 | ADRB2 |
| B2M | ELK1 | RXRA |
| NUP107 | NFKBIA | PRKCB |
| HLA-DPB1 | POR | PREP |
| FCAR | ODC1 | PRKCA |
| CTSG | XDH | PPARG |
| PDGFD | TOP1 | F10 |
| RASGRP1 | SOD1 | FOS |
| PRKCD | PRKCA | CYP3A4 |
| PON1 | MMP1 | CDK2 |
| CFHR3 | HIF1A | EGFR |
| IGAN1 | STAT1 | DPP4 |
| FCGR3B | RUNX1T1 | MAPK14 |
| CCL3 | CDK1 | MYC |
| ICAM3 | HSPA5 | CCND1 |
| TSLP | ERBB2 | BAX |
| SERPINB7 | ACACA | E2F1 |
| LRP2 | HMOX1 | CXCL2 |
| LCN2 | CYP3A4 | LTA4H |
| NID1 | CYP1A2 | PPARA |
| CCR1 | CAV1 | HMGCR |
| PODXL | MYC | CDKN1A |
| LCAT | F3 | NQO1 |
| FUT4 | GJA1 | SLC5A1 |
| HLA-DPA1 | CYP1A1 | RB1 |
| HLA-DQA1 | ICAM1 | RHO |
| SELE | IL1B | SLC5A2 |
| SCGB1A1 | CCL2 | FOSL1 |
| MIF | SELE | FOSL2 |
| CASP10 | VCAM1 | CDK4 |
| LMX1B | PTGER3 | GJA1 |
| SPG7 | CXCL8 | EPAS1 |
| ICOSLG | PRKCB | CYP19A1 |
| IGAN2 | BIRC5 | HTR2A |
| FOXP3 | DUOX2 | XDH |
| CCN2 | NOS3 | ELK1 |
| MTMR3 | HSPB1 | MTTP |
| IL13 | TGFB1 | ODC1 |
| ACSL4 | SULT1E1 | AR |
| AMMECR1 | MGAM | CDKN2A |
| KCNE5 | IL2 | NFKBIA |
| IL4 | NR1I2 | RELA |
| H2AC18 | CYP1B1 | COL3A1 |
| HORMAD2 | CCNB1 | PPARD |
| LRPAP1 | PLAT |  |
| CSF1 | THBD |  |
| C1GALT1 | SERPINE1 |  |
| AGT | COL1A1 |  |
| TRPC6 | IFNG |  |
| ETS1 | ALOX5 |  |
| SYK | IL1A |  |
| CD2AP | MPO |  |
| ACTN4 | TOP2A |  |
| ITGAM | NCF1 |  |
| SERPINE1 | ABCG2 |  |
| PECAM1 | HAS2 |  |
| GAS6 | GSTP1 |  |
| NAGLU | NFE2L2 |  |
| IL17A | NQO1 |  |
| IL2RA | PARP1 |  |
| COL4A6 | AHR |  |
| THY1 | PSMD3 |  |
| COPA | SLC2A4 |  |
| TNFAIP3 | COL3A1 |  |
| PTPN22 | CXCL11 |  |
| MAPK1 | CXCL2 |  |
| CERT1 | DCAF5 |  |
| CD81 | NR1I3 |  |
| WDR19 | CHEK2 |  |
| IFNG | INSR |  |
| SELP | CLDN4 |  |
| PTX3 | PPARA |  |
| REN | PPARD |  |
| NOS2 | HSF1 |  |
| TGFB1I1 | CRP |  |
| IFNA2 | CXCL10 |  |
| SPRY2 | CHUK |  |
| AXL | SPP1 |  |
| LAMP2 | RUNX2 |  |
| FGF2 | RASSF1 |  |
| SLC7A7 | E2F1 |  |
| PF4 | E2F2 |  |
| CD55 | ACPP |  |
| ENO1 | CTSD |  |
| NPPA | IGFBP3 |  |
| SUOX | IGF2 |  |
| VTI1B | CD40LG |  |
| PLD3 | IRF1 |  |
| PXDN | ERBB3 |  |
| PLD4 | PON1 |  |
| DGKK | DIO1 |  |
| MBOAT2 | PCOLCE |  |
| CD52 | NPEPPS |  |
| PLD5 | HK2 |  |
| TLR9 | NKX3-1 |  |
| HAVCR1 | CDK4 |  |
| VTN | MDM2 |  |
| VEGFA | PCNA |  |
| TLR4 | CASP7 |  |
| IL2 | MCL1 |  |
| PDCD1 | TYR |  |
| C1GALT1C1 | IL4 |  |
| TCEA2 | XIAP |  |
| MEFV | PTGES |  |
| BPI | NUF2 |  |
| IL1RN | ADCY2 |  |
| CLU | MET |  |
| SMAD2 | FOSL1 |  |
| ITGA4 | FOSL2 |  |
| THSD7A | CYCS |  |
| C5AR1 | ALOX12 |  |
| HLA-DQB1 | NFATC1 |  |
| MYH9 | TDRD7 |  |
| TNFSF4 | EGLN1 |  |
| MEST | NOX5 |  |
| GFND1 | FABP5 |  |
| AMMEC | APOD |  |
| ZAP70 | IGHG1 |  |
| MAGI2 | PRKACA |  |
| EMP2 | GABRA3 |  |
| LAGE3 | CHRNA7 |  |
| AKR1B1 | F2 |  |
| PDGFB | CALM |  |
| ITGB1 | PIK3CG |  |
| ALOX5 | FHUA |  |
| CCL4 | TOP2 |  |
| STAT3 | CDKN2A |  |
| JCHAIN | RAF1 |  |
| MIR148B | HERC5 |  |
| CXCR3 | PTEN |  |
| CD80 | GYRB |  |
| CXCL8 | APP |  |
| STAT4 | PTPN1 |  |
| CNOT11 | CES2 |  |
| MIR30A | HSD11B1 |  |
| MIR92A1 | HSD11B2 |  |
| LTF | FAAH |  |
| PLA2G1B | CYP17A1 |  |
| TINAG | TAS2R31 |  |
| CMIP | HMGCR |  |
| P3H4 | PTPN2 |  |
| TNIP1 | AKR1C2 |  |
| HMGB1 | AKR1C1 |  |
| CD69 | NR3C1 |  |
| HLA-A | HSD17B2 |  |
| SELL | PREP |  |
| TNFRSF1B | ATP12A |  |
| NOS3 | CYP2C19 |  |
| CRYAA | EPAS1 |  |
| PIGA | AKR1C3 |  |
| CD68 | NR1H3 |  |
| CGN | NR1H2 |  |
| SOX7 | MTTP |  |
| MIR214 | APOB |  |
| TNFRSF1A | C5AR1 |  |
| CD28 | TACR1 |  |
| TNFSF13B | SHBG |  |
| CXCL9 | CNR1 |  |
| IL4R | CNR2 |  |
| IL18 | SQLE |  |
| PLG | LIMK2 |  |
| SERPINF2 | MAPK14 |  |
| VWF | SERPINA6 |  |
| HLA-DOA | FNTA |  |
| ENG | FNTB |  |
| MIR21 | ADORA1 |  |
| DNASE1 | ADORA2A |  |
| ADIPOQ | ADORA3 |  |
| TLR2 | SLC29A1 |  |
| THBD | MME |  |
| IL7R | MAP2K1 |  |
| SERPINA3 | SLC5A2 |  |
| RNF207 | SLC5A1 |  |
| TRIM35 | CTRC |  |
| TRIM40 | SRD5A1 |  |
| TRIM42 |  |  |
| TRIM60 |  |  |
| GPR148 |  |  |
| TRIM34 |  |  |
| TLR3 |  |  |
| CD86 |  |  |
| AGER |  |  |
| CXCL10 |  |  |
| TFPI |  |  |
| INS |  |  |
| SCLY |  |  |
| PTPRC |  |  |
| IRF5 |  |  |
| CALR |  |  |
| IL5 |  |  |
| GZMB |  |  |
| CX3CL1 |  |  |
| PTEN |  |  |
| MMP1 |  |  |
| MIR200C |  |  |
| EDNRB |  |  |
| CR2 |  |  |
| CAT |  |  |
| BLK |  |  |
| IRAK1 |  |  |
| CD8A |  |  |
| MYOM2 |  |  |
| PTPRO |  |  |
| TNFRSF6B |  |  |
| ITGAX |  |  |
| EGF |  |  |
| PIK3CD |  |  |
| PIK3R1 |  |  |
| MECP2 |  |  |
| UBE2L3 |  |  |
| COL7A1 |  |  |
| TREX1 |  |  |
| ALMS1 |  |  |
| KMT2D |  |  |
| JAZF1 |  |  |
| KIAA0319L |  |  |
| PXK |  |  |
| BANK1 |  |  |
| MIR7108 |  |  |
| SLEB3 |  |  |
| SLEB12 |  |  |
| SLEB13 |  |  |
| SLEB14 |  |  |
| SLEB15 |  |  |
| SLEB4 |  |  |
| SLEB5 |  |  |
| SLEB7 |  |  |
| SLEB8 |  |  |
| HRAS |  |  |
| KRAS |  |  |
| MMP2 |  |  |
| C4B_2 |  |  |
| RBMS1 |  |  |
| HLA-DPB2 |  |  |
| MTOR |  |  |
| GGT1 |  |  |
| ACTA2 |  |  |
| CEL |  |  |
| JAK1 |  |  |
| HMOX1 |  |  |
| TPMT |  |  |
| MIR146A |  |  |
| TIMP1 |  |  |
| RXRB |  |  |
| SERPINA1 |  |  |
| TNFSF13 |  |  |
| RPLP2 |  |  |
| COL11A2 |  |  |
| RING1 |  |  |
| HSD17B8 |  |  |
| CD2 |  |  |
| S100A8 |  |  |
| S100A9 |  |  |
| HSP90AA1 |  |  |
| ARG1 |  |  |
| MMP9 |  |  |
| GPT |  |  |
| CSF2 |  |  |
| RIPK1 |  |  |
| DNM2 |  |  |
| CD27 |  |  |
| AIRE |  |  |
| DYNC1H1 |  |  |
| MPZ |  |  |
| MTMR2 |  |  |
| ARFGAP1 |  |  |
| GDAP1 |  |  |
| LRBA |  |  |
| ARFGAP3 |  |  |
| MAGT1 |  |  |
| CD58 |  |  |
| SBF2 |  |  |
| SH3TC2 |  |  |
| SKA1 |  |  |
| SMPDL3B |  |  |
| TRIAP1 |  |  |
| MT-CO1 |  |  |
| MIR1915 |  |  |
| MFF-DT |  |  |
| LAMB1 |  |  |
| HLA-DMA |  |  |
| F3 |  |  |
| LTC4S |  |  |
| TRIM21 |  |  |
| IL2RB |  |  |
| APOH |  |  |
| SERPINB1 |  |  |
| H3C14 |  |  |
| F2 |  |  |
| CD40 |  |  |
| HLA-DRA |  |  |
| CD44 |  |  |
| CASP8 |  |  |
| FTH1 |  |  |
| EBI3 |  |  |
| TP53 |  |  |
| TNFSF12 |  |  |
| CSF3 |  |  |
| DDX58 |  |  |
| TRAF1 |  |  |
| IFNB1 |  |  |
| SIGLEC1 |  |  |
| HLA-DRB3 |  |  |
| TPO |  |  |
| HLA-DMB |  |  |
| HLA-DOB |  |  |
| HLA-DRB5 |  |  |
| HLA-DQA2 |  |  |
| CYP2D6 |  |  |
| TAGLN |  |  |
| AIM2 |  |  |
| BLZF1 |  |  |
| BTNL2 |  |  |
| FCRL3 |  |  |
| SH2D1A |  |  |
| HSPD1 |  |  |
| LEP |  |  |
| BCL2L11 |  |  |
| PTPN3 |  |  |
| CXCL13 |  |  |
| RNASE3 |  |  |
| IL1R1 |  |  |
| ELN |  |  |
| GREM1 |  |  |
| EPO |  |  |
| BMP7 |  |  |
| LYN |  |  |
| TNFSF10 |  |  |
| CFLAR |  |  |
| ALPI |  |  |
| IL1A |  |  |
| CX3CR1 |  |  |
| PADI4 |  |  |
| IRF4 |  |  |
| MICA |  |  |
| ITGAD |  |  |
| ALPL |  |  |
| NRAS |  |  |
| ASS1 |  |  |
| FADD |  |  |
| NPR2 |  |  |
| GNAI3 |  |  |
| ARF1 |  |  |
| ALPP |  |  |
| FST |  |  |
| HDAC9 |  |  |
| MATK |  |  |
| GATM |  |  |
| CCR4 |  |  |
| CIITA |  |  |
| PRF1 |  |  |
| RAG1 |  |  |
| PCSK1 |  |  |
| HAMP |  |  |
| CCL21 |  |  |
| FAF1 |  |  |
| RIPK3 |  |  |
| SLC26A5 |  |  |
| UNC13D |  |  |
| TIMM8A |  |  |
| SSB |  |  |
| TRIP11 |  |  |
| DCTD |  |  |
| EFTUD2 |  |  |
| AIMP2 |  |  |
| MLKL |  |  |
| IL15RA |  |  |
| SPINK5 |  |  |
| SLC30A5 |  |  |
| NT5C |  |  |
| LGALS3BP |  |  |
| ANKH |  |  |
| CLPS |  |  |
| IFT122 |  |  |
| NUP133 |  |  |
| TCN1 |  |  |
| IL32 |  |  |
| IFT140 |  |  |
| SLC30A7 |  |  |
| NUP85 |  |  |
| NUP160 |  |  |
| SEMA4G |  |  |
| SEMA5B |  |  |
| SEMA6A |  |  |
| FIP1L1 |  |  |
| IL27 |  |  |
| TTC21B |  |  |
| WDR35 |  |  |
| CCL26 |  |  |
| CENPB |  |  |
| RAB3IL1 |  |  |
| ARFGAP2 |  |  |
| AHCTF1 |  |  |
| ANKRD49 |  |  |
| PAM16 |  |  |
| MAS1L |  |  |
| VILL |  |  |
| WSCD1 |  |  |
| CCDC86 |  |  |
| COBL |  |  |
| NUP43 |  |  |
| ALPG |  |  |
| CENPV |  |  |
| MT-CYB |  |  |
| CDR1 |  |  |
| GET1 |  |  |
| DOP1A |  |  |
| LINC01554 |  |  |
| MIR98 |  |  |
| MT-TF |  |  |
| MT-TH |  |  |
| ABCB1 |  |  |
| CCL5 |  |  |
| IL15 |  |  |
| SOD1 |  |  |
| CST3 |  |  |
| CCR2 |  |  |
| CXCL1 |  |  |
| FCGR3A |  |  |
| BCL2 |  |  |
| HSPG2 |  |  |
| COL4A2 |  |  |
| JAK2 |  |  |
| STAT1 |  |  |
| CAMP |  |  |
| IGHE |  |  |
| ADAMTS13 |  |  |
| CXCL12 |  |  |
| CD14 |  |  |
| HAVCR2 |  |  |
| IL21 |  |  |
| RETN |  |  |
| TLR7 |  |  |
| LGALS8 |  |  |
| ANXA5 |  |  |
| C1R |  |  |
| LAMA1 |  |  |
| IL17F |  |  |
| GATA3 |  |  |
| LTA |  |  |
| CXCR4 |  |  |
| MMP3 |  |  |
| DNMT1 |  |  |
| MYD88 |  |  |
| KRT18 |  |  |
| CP |  |  |
| IFIH1 |  |  |
| NLRP3 |  |  |
| CISH |  |  |
| SOCS3 |  |  |
| SOCS1 |  |  |
| SAA1 |  |  |
| CXCL16 |  |  |
| IL17C |  |  |
| MIR150 |  |  |
| MIR320A |  |  |
| SLC3A1 |  |  |
| PTK2 |  |  |
| ICOS |  |  |
| FCN2 |  |  |
| MIR155 |  |  |
| TRA |  |  |
| F2R |  |  |
| IL6R |  |  |
| COL4A1 |  |  |
| TNFRSF13B |  |  |
| TBX21 |  |  |
| LAMB2 |  |  |
| MAN2A1 |  |  |
| LAMA5 |  |  |
| FCN3 |  |  |
| MX1 |  |  |
| ASGR2 |  |  |
| SULT1A3 |  |  |
| CFHR4 |  |  |
| MIR223 |  |  |
| CASP3 |  |  |
| AMBP |  |  |
| ANXA2 |  |  |
| ISG15 |  |  |
| TLR5 |  |  |
| FCGR1A |  |  |
| PLAU |  |  |
| ADAMTSL1 |  |  |
| HLA-B |  |  |
| CYP11B2 |  |  |
| G6PD |  |  |
| BCHE |  |  |
| CREB1 |  |  |
| CSK |  |  |
| COL1A2 |  |  |
| TGFB3 |  |  |
| COL5A1 |  |  |
| CD274 |  |  |
| PRL |  |  |
| TNFRSF17 |  |  |
| TNFRSF4 |  |  |
| DNASE1L3 |  |  |
| DOCK8 |  |  |
| CXCL11 |  |  |
| RNPC3 |  |  |
| HLA-DRB4 |  |  |
| BMP6 |  |  |
| JUN |  |  |
| AKT1 |  |  |
| DDC |  |  |
| LCK |  |  |
| TYK2 |  |  |
| ADA |  |  |
| CA2 |  |  |
| GRIN2A |  |  |
| RAC2 |  |  |
| MERTK |  |  |
| NR3C1 |  |  |
| PRKD1 |  |  |
| COL1A1 |  |  |
| MAPK3 |  |  |
| ACTB |  |  |
| CD247 |  |  |
| SIRT1 |  |  |
| KCNH2 |  |  |
| ABCA3 |  |  |
| CHRM3 |  |  |
| CHRNA4 |  |  |
| EEF2 |  |  |
| PPP2CA |  |  |
| PIK3CG |  |  |
| POMC |  |  |
| WAS |  |  |
| AK1 |  |  |
| CDH5 |  |  |
| SLC11A1 |  |  |
| SPTAN1 |  |  |
| IRF3 |  |  |
| TLR8 |  |  |
| IRF1 |  |  |
| OTC |  |  |
| KRT8 |  |  |
| LMNA |  |  |
| CYP2C19 |  |  |
| DLAT |  |  |
| GPT2 |  |  |
| PAX2 |  |  |
| IRF7 |  |  |
| CAMK4 |  |  |
| CCR7 |  |  |
| AQP5 |  |  |
| ASL |  |  |
| AGL |  |  |
| AGPAT2 |  |  |
| BCL6 |  |  |
| CYP1A2 |  |  |
| CD22 |  |  |
| CD38 |  |  |
| NEK9 |  |  |
| IL10RA |  |  |
| IFNAR1 |  |  |
| ICAM2 |  |  |
| PPP3R1 |  |  |
| PRODH |  |  |
| PRDM1 |  |  |
| PKD1 |  |  |
| OAS1 |  |  |
| IRF8 |  |  |
| RASGRP2 |  |  |
| XRCC6 |  |  |
| AOC3 |  |  |
| ATG5 |  |  |
| FOXC2 |  |  |
| C2 |  |  |
| IL12RB1 |  |  |
| SFTPD |  |  |
| SNRPB |  |  |
| SNRPN |  |  |
| NLRP1 |  |  |
| SLC7A5 |  |  |
| SLC7A11 |  |  |
| PLCE1 |  |  |
| SLC17A5 |  |  |
| TNFRSF13C |  |  |
| XRCC5 |  |  |
| FTCD |  |  |
| FERMT3 |  |  |
| HERC1 |  |  |
| DSG1 |  |  |
| CD244 |  |  |
| CD70 |  |  |
| SFTPB |  |  |
| NPHP1 |  |  |
| SOX17 |  |  |
| SDC1 |  |  |
| SLC7A6 |  |  |
| SLK |  |  |
| SLC1A7 |  |  |
| SEPSECS |  |  |
| LAMA2 |  |  |
| NARS2 |  |  |
| ZMPSTE24 |  |  |
| BSCL2 |  |  |
| HPGDS |  |  |
| IL16 |  |  |
| IFI16 |  |  |
| PROCR |  |  |
| SLC7A2 |  |  |
| SLC3A2 |  |  |
| PROX1 |  |  |
| CD1D |  |  |
| SELPLG |  |  |
| NAGS |  |  |
| BBS2 |  |  |
| BBS4 |  |  |
| CALB1 |  |  |
| CCL19 |  |  |
| CCT3 |  |  |
| LTK |  |  |
| FOXC1 |  |  |
| FERMT1 |  |  |
| CD5 |  |  |
| CIDEC |  |  |
| MPG |  |  |
| COL5A2 |  |  |
| CXCR5 |  |  |
| CREM |  |  |
| IL21R |  |  |
| PRPF6 |  |  |
| SNRPE |  |  |
| SARS2 |  |  |
| RPLP0 |  |  |
| RPL7 |  |  |
| SLC7A8 |  |  |
| SLC4A5 |  |  |
| SLAMF7 |  |  |
| SIL1 |  |  |
| RASGRP3 |  |  |
| TLN1 |  |  |
| KIF3A |  |  |
| BBS10 |  |  |
| APBB1IP |  |  |
| ASGR1 |  |  |
| CRYGD |  |  |
| CRB2 |  |  |
| CEP290 |  |  |
| COG2 |  |  |
| RPGR |  |  |
| CD276 |  |  |
| GPR55 |  |  |
| CD72 |  |  |
| SNRPA |  |  |
| SLC35C1 |  |  |
| SLC5A11 |  |  |
| SLAMF1 |  |  |
| SLAMF6 |  |  |
| SSRP1 |  |  |
| RASSF5 |  |  |
| IL33 |  |  |
| PMP22 |  |  |
| BBS5 |  |  |
| GOLM1 |  |  |
| FGL2 |  |  |
| FUZ |  |  |
| LY9 |  |  |
| BTLA |  |  |
| RPGRIP1L |  |  |
| NEU2 |  |  |
| IL23A |  |  |
| PDLIM5 |  |  |
| NPHP3 |  |  |
| IFIT3 |  |  |
| SLC15A4 |  |  |
| LDB1 |  |  |
| SNRPD1 |  |  |
| BBS7 |  |  |
| BBS1 |  |  |
| FERMT2 |  |  |
| SNRNP70 |  |  |
| PTGFRN |  |  |
| LDB2 |  |  |
| IL36G |  |  |
| ALYREF |  |  |
| BCL2L12 |  |  |
| CDR2 |  |  |
| IFT43 |  |  |
| IFT80 |  |  |
| SNRPB2 |  |  |
| LCOR |  |  |
| TRIM68 |  |  |
| SYNJ2BP |  |  |
| IL37 |  |  |
| GATB |  |  |
| ADAMTSL5 |  |  |
| FOXJ1 |  |  |
| GIMAP5 |  |  |
| EMCN |  |  |
| SNRPD3 |  |  |
| TSPAN4 |  |  |
| TTI2 |  |  |
| TIMD4 |  |  |
| BBS12 |  |  |
| CROCC |  |  |
| EPSTI1 |  |  |
| SSPN |  |  |
| PHRF1 |  |  |
| SRCIN1 |  |  |
| WDFY4 |  |  |
| EPGN |  |  |
| NARS1 |  |  |
| H4-16 |  |  |
| CNTD1 |  |  |
| ADIRF |  |  |
| CAVIN1 |  |  |
| BSX |  |  |
| CLEC4C |  |  |
| COQ8B |  |  |
| RBM33 |  |  |
| H2AC20 |  |  |
| H2BC21 |  |  |
| SPTY2D1 |  |  |
| TEPP |  |  |
| CXorf21 |  |  |
| STH |  |  |
| CEP295 |  |  |
| ZNRD2 |  |  |
| MALAT1 |  |  |
| MIR184 |  |  |
| NEAT1 |  |  |
| MIR125A |  |  |
| MIR185 |  |  |
| MIR210 |  |  |
| MIR99A |  |  |
| MIR433 |  |  |
| MIR23A |  |  |
| MIR142 |  |  |
| MIR615 |  |  |
| MIRLET7E |  |  |
| MIR139 |  |  |
| MIR195 |  |  |
| MIR345 |  |  |
| MIR197 |  |  |
| MIR15B |  |  |
| MIR134 |  |  |
| MIR346 |  |  |
| MIR208A |  |  |
| MIR423 |  |  |
| MIR324 |  |  |
| MIR484 |  |  |
| MIR130B |  |  |
| MIR296 |  |  |
| MIR30D |  |  |
| MIR654 |  |  |
| MIR612 |  |  |
| MIR638 |  |  |
| MIR381 |  |  |
| MIR494 |  |  |
| MIR608 |  |  |
| MAGI2-AS3 |  |  |
| MIR198 |  |  |
| MIR518B |  |  |
| MIR557 |  |  |
| MIR575 |  |  |
| MIR601 |  |  |
| MIR657 |  |  |
| MIR629 |  |  |
| MIR637 |  |  |
| MIR642A |  |  |
| MIR92B |  |  |
| MIR769 |  |  |
| MIR486-1 |  |  |
| MIR500A |  |  |
| IFNG-AS1 |  |  |
| MIR583 |  |  |
| MIR662 |  |  |
| MIR663A |  |  |
| MIR600 |  |  |
| MIR658 |  |  |
| MIR611 |  |  |
| LINC00426 |  |  |
| MIR325 |  |  |
| ALMS1P1 |  |  |
| MIR596 |  |  |
| MIR602 |  |  |
| MIR622 |  |  |
| CXCR2P1 |  |  |
| LINC02384 |  |  |
| MIR6069 |  |  |
| ENSG00000207300 |  |  |
| ENSG00000280878 |  |  |
| ENSG00000266919 |  |  |
| SLEN3 |  |  |
| SLEH1 |  |  |
| SLEN1 |  |  |
| SLEN2 |  |  |
| PRSS1 |  |  |
| PLAUR |  |  |
| VIM |  |  |
| SDHB |  |  |
| RBP4 |  |  |
| CD36 |  |  |
| TAP2 |  |  |
| PCNA |  |  |
| HIF1A |  |  |
| NOS1 |  |  |
| TAP1 |  |  |
| NEU1 |  |  |
| FLT1 |  |  |
| PTK2B |  |  |
| PSMB8 |  |  |
| LAP3 |  |  |
| ADM |  |  |
| DCN |  |  |
| CTNNB1 |  |  |
| CASP1 |  |  |
| ARG2 |  |  |
| CTNND1 |  |  |
| SERPINH1 |  |  |
| TGFBR2 |  |  |
| NFKB1 |  |  |
| CD59 |  |  |
| DES |  |  |
| PSMB9 |  |  |
| AGPAT1 |  |  |
| KITLG |  |  |
| BGLAP |  |  |
| SLPI |  |  |
| CTSB |  |  |
| SOD2 |  |  |
| ITGB3 |  |  |
| PLAT |  |  |
| PTGS2 |  |  |
| HSPA5 |  |  |
| F5 |  |  |
| DDIT3 |  |  |
| ALOX5AP |  |  |
| CYBA |  |  |
| GUSB |  |  |
| MTHFR |  |  |
| CMA1 |  |  |
| PDGFRB |  |  |
| SMAD3 |  |  |
| HBEGF |  |  |
| TSBP1 |  |  |
| SGK1 |  |  |
| H1-5 |  |  |
| APOB |  |  |
| AGTR2 |  |  |
| TGFB2 |  |  |
| NAT2 |  |  |
| GSTM1 |  |  |
| LALBA |  |  |
| RARA |  |  |
| GAPDH |  |  |
| PDE5A |  |  |
| PARP1 |  |  |
| HPSE |  |  |
| HP |  |  |
| THBS1 |  |  |
| LIF |  |  |
| P2RX7 |  |  |
| IL27RA |  |  |
| IGK |  |  |
| ITGA2 |  |  |
| ITGB6 |  |  |
| CARD9 |  |  |
| VAV3 |  |  |
| SRC |  |  |
| S100A6 |  |  |
| S100A12 |  |  |
| TNFRSF11B |  |  |
| PTGS1 |  |  |
| FCER2 |  |  |
| BDKRB1 |  |  |
| MB |  |  |
| CD34 |  |  |
| BRD2 |  |  |
| HLA-DQB2 |  |  |
| GPSM3 |  |  |
| HLA-DRB6 |  |  |
| CYP21A1P |  |  |
| HLA-DQB1-AS1 |  |  |
| PSMB8-AS1 |  |  |
| ENSG00000250264 |  |  |
| MMP11 |  |  |
| MYOC |  |  |
| CABIN1 |  |  |
| JUND |  |  |
| MBL3P |  |  |
| INSR |  |  |
| ADRB2 |  |  |
| CDKN1C |  |  |
| GSTT1 |  |  |
| RXRA |  |  |
| SERPINC1 |  |  |
| RAP1A |  |  |
| EZR |  |  |
| COL18A1 |  |  |
| SMAD1 |  |  |
| LAMA3 |  |  |
| RRAS |  |  |
| TREH |  |  |
| CD207 |  |  |
| GSR |  |  |
| CDKN1B |  |  |
| PTGER2 |  |  |
| EDN3 |  |  |
| PRKCB |  |  |
| IL18R1 |  |  |
| PREP |  |  |
| HSPA4 |  |  |
| EPRS1 |  |  |
| PTPRQ |  |  |
| CSF1R |  |  |
| CSNK2B |  |  |
| POU5F1 |  |  |
| EHMT2 |  |  |
| ST6GAL1 |  |  |
| MPDU1 |  |  |
| RNF5 |  |  |
| LY75 |  |  |
| STK19 |  |  |
| TCF19 |  |  |
| SOX15 |  |  |
| EGFL8 |  |  |
| C6orf15 |  |  |
| GPANK1 |  |  |
| ACOXL |  |  |
| DXO |  |  |
| PRRC2A |  |  |
| PSORS1C1 |  |  |
| MUCL3 |  |  |
| TNFSF12-TNFSF13 |  |  |
| HCG9 |  |  |
| PPT2-EGFL8 |  |  |
| HORMAD2-AS1 |  |  |
| DEFA9P |  |  |
| MIR6833 |  |  |
| MIR6832 |  |  |
| KDR |  |  |
| KIT |  |  |
| TGFBR1 |  |  |
| EP300 |  |  |
| PRKCA |  |  |
| KDM1A |  |  |
| VCAN |  |  |
| MS4A1 |  |  |
| AQP1 |  |  |
| S100B |  |  |
| TGFBR3 |  |  |
| SP1 |  |  |
| TRAF2 |  |  |
| HTT |  |  |
| POLR1A |  |  |
| PPBP |  |  |
| PON2 |  |  |
| LCN1 |  |  |
| CD1B |  |  |
| DNAJB9 |  |  |
| PLVAP |  |  |
| ACKR1 |  |  |
| MPP2 |  |  |
| NM |  |  |
| CTSL |  |  |
| TFRC |  |  |
| UMOD |  |  |
| PPARG |  |  |
| NAGA |  |  |
| CDH1 |  |  |
| CTNNA1 |  |  |
| JUP |  |  |
| S100A4 |  |  |
| ITGA8 |  |  |
| MPIG6B |  |  |
| TSHR |  |  |
| IGHA1 |  |  |
| FABP1 |  |  |
| EXT2 |  |  |
| EIF4A2 |  |  |
| BAK1 |  |  |
| HLA-C |  |  |
| DAXX |  |  |
| CHRNB1 |  |  |
| SKIV2L |  |  |
| TNXB |  |  |
| TAPBP |  |  |
| SYNGAP1 |  |  |
| DDAH2 |  |  |
| PADI3 |  |  |
| UBR5 |  |  |
| KLF10 |  |  |
| MICB |  |  |
| MANBA |  |  |
| ATP1B2 |  |  |
| CLIC1 |  |  |
| PADI2 |  |  |
| INPP5E |  |  |
| HLA-E |  |  |
| MSH5 |  |  |
| B3GALT4 |  |  |
| APOM |  |  |
| LSM2 |  |  |
| MDC1 |  |  |
| GTF2H4 |  |  |
| DEFA1 |  |  |
| PADI1 |  |  |
| SENP3 |  |  |
| PHF1 |  |  |
| DHX16 |  |  |
| FXR2 |  |  |
| BDH2 |  |  |
| RGL2 |  |  |
| DUSP22 |  |  |
| DDX39B |  |  |
| PBX2 |  |  |
| SAT2 |  |  |
| KIFC1 |  |  |
| ACCS |  |  |
| CCHCR1 |  |  |
| DEFA5 |  |  |
| PPT2 |  |  |
| ATF6B |  |  |
| FCRL4 |  |  |
| NFKBIL1 |  |  |
| FKBPL |  |  |
| DEFA4 |  |  |
| ODF1 |  |  |
| SNAPC4 |  |  |
| WDR46 |  |  |
| VPS52 |  |  |
| BAG6 |  |  |
| ASCC2 |  |  |
| RTP4 |  |  |
| TBCCD1 |  |  |
| VARS1 |  |  |
| ABHD16A |  |  |
| ZNF764 |  |  |
| NELFE |  |  |
| SLC9B1 |  |  |
| PYDC1 |  |  |
| PRRT1 |  |  |
| NRM |  |  |
| NBPF1 |  |  |
| RTP1 |  |  |
| RPL39L |  |  |
| PSORS1C2 |  |  |
| VWA7 |  |  |
| C6orf47 |  |  |
| LY6G5B |  |  |
| DNLZ |  |  |
| LY6G5C |  |  |
| C11orf96 |  |  |
| SFTA2 |  |  |
| SAPCD1 |  |  |
| SNHG32 |  |  |
| TNXA |  |  |
| PSORS1C3 |  |  |
| LY75-CD302 |  |  |
| HCG22 |  |  |
| SNORD117 |  |  |
| PPP1R2P1 |  |  |
| SNORA48 |  |  |
| HCG23 |  |  |
| ADIPOQ-AS1 |  |  |
| HCG24 |  |  |
| HCG25 |  |  |
| ALKBH3-AS1 |  |  |
| HCG21 |  |  |
| LOC100996842 |  |  |
| SENP3-EIF4A1 |  |  |
| HLA-DRB9 |  |  |
| MIR3972 |  |  |
| MICD |  |  |
| MIR6721 |  |  |
| HLA-DQB3 |  |  |
| DEFA7P |  |  |
| DEFT1P |  |  |
| DEFA10P |  |  |
| EHMT2-AS1 |  |  |
| TSBP1-AS1 |  |  |
| ENSG00000263020 |  |  |
| RPL32P1 |  |  |
| HLA-DPA3 |  |  |
| ENSG00000226266 |  |  |
| RPL3P2 |  |  |
| STK19B |  |  |
| ENSG00000248993 |  |  |
| ENSG00000253633 |  |  |
| ENSG00000272501 |  |  |
| ENSG00000260911 |  |  |
| RNU6-1224P |  |  |
| RNU6-850P |  |  |
| ENSG00000227217 |  |  |
| ENSG00000232080 |  |  |
| ENSG00000255165 |  |  |
| MTCO3P1 |  |  |
| RNU6-1133P |  |  |
| ENSG00000223837 |  |  |
| ENSG00000199332 |  |  |
| ENSG00000201207 |  |  |
| RNU6ATAC8P |  |  |
| ENSG00000272037 |  |  |
| ENSG00000272221 |  |  |
| ENSG00000272540 |  |  |
| ENSG00000260651 |  |  |
| ENSG00000245857 |  |  |
| ENSG00000276384 |  |  |
| ENSG00000279159 |  |  |
| ENSG00000271581 |  |  |
| RF00017-5416 |  |  |
| RF00017-5420 |  |  |
| lnc-SOX15-2 |  |  |
| lnc-SOX15-4 |  |  |
| lnc-CCHCR1-2 |  |  |
| RF00017-7244 |  |  |
| RF00017-7245 |  |  |
| lnc-ASCC2-1 |  |  |
| MG828730-062 |  |  |
| MN298114-200 |  |  |
| HSALNG0049430 |  |  |
| lnc-HLA-DMA-2 |  |  |
| lnc-HLA-DPA1-2 |  |  |
| lnc-HLA-DQB1-2 |  |  |
| lnc-HLA-DRB1-8 |  |  |
| lnc-DEFA1-2 |  |  |
| RF00951-005 |  |  |
| NONHSAG045982.2 |  |  |
| L13304-035 |  |  |
| L13712-010 |  |  |
| piR-38736-012 |  |  |
| lnc-ODF1-2 |  |  |
| lnc-ADIPOQ-4 |  |  |
| RF00017-5428 |  |  |
| lnc-C6orf47-2-001 |  |  |
| AB933314 |  |  |
| lnc-COX6A2-3 |  |  |
| lnc-FCRL2-1 |  |  |
| lnc-FCRL3-2 |  |  |
| piR-51137-089 |  |  |
| lnc-DXO-3 |  |  |
| RF00994-753 |  |  |
| lnc-HLA-DQA1-9 |  |  |
| lnc-HLA-DQB1-1 |  |  |
| lnc-HLA-DRB1-7 |  |  |
| lnc-DNLZ-1 |  |  |
| NONHSAG046097.2 |  |  |
| LOC107986589 |  |  |
| NONHSAG020715.2 |  |  |
| RF00026-1095 |  |  |
| piR-32216 |  |  |
| MN298667 |  |  |
| piR-50443-222 |  |  |
| piR-60272-005 |  |  |
| piR-52526 |  |  |
| lnc-DEFA1-1 |  |  |
| HSALNG0019943 |  |  |
| ENSG00000231700 |  |  |
| LOC105373717 |  |  |
| NONHSAG045750.2 |  |  |
| piR-39858-550 |  |  |
| piR-33103-025 |  |  |
| LOC107986588 |  |  |
| IL1RAPL2 |  |  |
| APOE |  |  |
| UGT2B7 |  |  |
| UGT1A7 |  |  |
| HGF |  |  |
| TF |  |  |
| EGR1 |  |  |
| F10 |  |  |
| TGIF1 |  |  |
| IL9 |  |  |
| FOS |  |  |
| CYP2C9 |  |  |
| CYP3A4 |  |  |
| UCHL1 |  |  |
| IL11 |  |  |
| ENPP1 |  |  |
| TRADD |  |  |
| CDK2 |  |  |
| EGFR |  |  |
| PXN |  |  |
| PIGR |  |  |
| ST6GALNAC2 |  |  |
| GSN |  |  |
| F2RL1 |  |  |
| DDN |  |  |
| DPP4 |  |  |
| EPHX2 |  |  |
| MAPK14 |  |  |
| MYC |  |  |
| MMP7 |  |  |
| ANKRD1 |  |  |
| JAK3 |  |  |
| TFR2 |  |  |
| IL7 |  |  |
| HPX |  |  |
| MUC20 |  |  |
| ANGPT2 |  |  |
| SSX2IP |  |  |
| ESR1 |  |  |
| CCND1 |  |  |
| TTR |  |  |
| BAX |  |  |
| NRP1 |  |  |
| FGB |  |  |
| ENPEP |  |  |
| FCER1A |  |  |
| CXCR1 |  |  |
| ZFYVE9 |  |  |
| NES |  |  |
| ADPRH |  |  |
| IFI27 |  |  |
| MAPK8 |  |  |
| PLCG1 |  |  |
| PLA2G6 |  |  |
| TNFRSF11A |  |  |
| NPNT |  |  |
| MPV17 |  |  |
| NOTCH1 |  |  |
| LDLR |  |  |
| TLR1 |  |  |
| VHL |  |  |
| IL5RA |  |  |
| NPY1R |  |  |
| GPX3 |  |  |
| PDGFA |  |  |
| SCARB2 |  |  |
| E2F1 |  |  |
| ATL1 |  |  |
| IGHMBP2 |  |  |
| FDX1 |  |  |
| CXCL2 |  |  |
| CCL13 |  |  |
| LIMA1 |  |  |
| MIRLET7B |  |  |
| TRB |  |  |
| ANPEP |  |  |
| LTA4H |  |  |
| ALOX15 |  |  |
| MMP12 |  |  |
| AZIN2 |  |  |
| SLC22A17 |  |  |
| TBXAS1 |  |  |
| EDNRA |  |  |
| CLDN1 |  |  |
| PTGDS |  |  |
| PTHLH |  |  |
| PPARA |  |  |
| PROM1 |  |  |
| NPPB |  |  |
| KL |  |  |
| C9 |  |  |
| CD47 |  |  |
| IL22 |  |  |
| TFF3 |  |  |
| NPPC |  |  |
| LAMP3 |  |  |
| CCN1 |  |  |
| MIR152 |  |  |
| IGLV3-21 |  |  |
| IGF1 |  |  |
| NOTCH3 |  |  |
| VCL |  |  |
| ITGA3 |  |  |
| HMGCR |  |  |
| ADD1 |  |  |
| PDGFC |  |  |
| ADAM10 |  |  |
| CDK5 |  |  |
| EPHB2 |  |  |
| CDKN1A |  |  |
| MYB |  |  |
| NGF |  |  |
| PLA2G7 |  |  |
| NQO1 |  |  |
| SLC5A1 |  |  |
| RB1 |  |  |
| APOA1 |  |  |
| NTRK1 |  |  |
| FGA |  |  |
| ACTA1 |  |  |
| MUC1 |  |  |
| RHO |  |  |
| SLC5A2 |  |  |
| PHB |  |  |
| KLKB1 |  |  |
| LBR |  |  |
| AQP2 |  |  |
| BCAT1 |  |  |
| TKT |  |  |
| FGF23 |  |  |
| BID |  |  |
| CDK5R1 |  |  |
| NOTCH4 |  |  |
| PPP4C |  |  |
| NGFR |  |  |
| CCNA2 |  |  |
| MASP2 |  |  |
| ATP6AP2 |  |  |
| B4GALT1 |  |  |
| FOSL1 |  |  |
| HIPK2 |  |  |
| CNDP1 |  |  |
| MST1 |  |  |
| CORIN |  |  |
| SOAT1 |  |  |
| OCRL |  |  |
| HIF1AN |  |  |
| CALCA |  |  |
| CCL20 |  |  |
| GNG2 |  |  |
| IL12RB2 |  |  |
| SOCS2 |  |  |
| NFIB |  |  |
| SMAD7 |  |  |
| PTN |  |  |
| LAMC1 |  |  |
| POSTN |  |  |
| CLCN5 |  |  |
| GDF15 |  |  |
| BHLHE40 |  |  |
| IL1RL1 |  |  |
| TNFSF14 |  |  |
| TNR |  |  |
| TNFAIP1 |  |  |
| TRDN |  |  |
| BOK |  |  |
| ACSM3 |  |  |
| GUCA2B |  |  |
| RHOD |  |  |
| NTN4 |  |  |
| YBX1 |  |  |
| RP1 |  |  |
| GCM1 |  |  |
| CLEC12A |  |  |
| PPP4R1 |  |  |
| PHLDB1 |  |  |
| XCL1 |  |  |
| MUC16 |  |  |
| DEFA3 |  |  |
| LAYN |  |  |
| VSIG4 |  |  |
| WFIKKN2 |  |  |
| IL26 |  |  |
| OR4D2 |  |  |
| MIR100 |  |  |
| MIR204 |  |  |
| MIR222 |  |  |
| MIR221 |  |  |
| MIR877 |  |  |
| DEFA1A3 |  |  |
| HNP1 |  |  |
| IGF1R |  |  |
| LPL |  |  |
| CYLD |  |  |
| TGM2 |  |  |
| LRP1 |  |  |
| IRS1 |  |  |
| MTR |  |  |
| SFN |  |  |
| GALNT2 |  |  |
| SHC1 |  |  |
| AGRN |  |  |
| MBP |  |  |
| GHRL |  |  |
| AZGP1 |  |  |
| USP2 |  |  |
| PNPLA8 |  |  |
| LTBR |  |  |
| FOSL2 |  |  |
| SNX9 |  |  |
| ITGA1 |  |  |
| PDPN |  |  |
| DACH1 |  |  |
| TRAC |  |  |
| XIST |  |  |
| MIR217 |  |  |
| CDK4 |  |  |
| BTK |  |  |
| EPHB4 |  |  |
| SLC2A1 |  |  |
| ALK |  |  |
| ADAM17 |  |  |
| COMT |  |  |
| CFTR |  |  |
| GJA1 |  |  |
| ACTN1 |  |  |
| DRD2 |  |  |
| SPARC |  |  |
| SMAD4 |  |  |
| STAT6 |  |  |
| MAP2K3 |  |  |
| ANXA1 |  |  |
| PLA2G4A |  |  |
| GYS1 |  |  |
| EPAS1 |  |  |
| MAPK13 |  |  |
| F12 |  |  |
| FGF1 |  |  |
| ACE2 |  |  |
| ABCA1 |  |  |
| CYP19A1 |  |  |
| MST1R |  |  |
| CDH11 |  |  |
| CXCR2 |  |  |
| ITGA5 |  |  |
| EIF2AK3 |  |  |
| GNB3 |  |  |
| MAP2K6 |  |  |
| MAP3K5 |  |  |
| DNM1L |  |  |
| DDR1 |  |  |
| SETD2 |  |  |
| HTR2A |  |  |
| SLC12A3 |  |  |
| TNFSF11 |  |  |
| XDH |  |  |
| RHOA |  |  |
| CETP |  |  |
| NDUFS3 |  |  |
| TYMP |  |  |
| KLK3 |  |  |
| DAG1 |  |  |
| PPARGC1A |  |  |
| GP1BA |  |  |
| AVP |  |  |
| LPAR1 |  |  |
| ADRB3 |  |  |
| AICDA |  |  |
| HNRNPA2B1 |  |  |
| PDP1 |  |  |
| PAFAH1B1 |  |  |
| PRCP |  |  |
| UCP2 |  |  |
| STAT5A |  |  |
| CYP21A2 |  |  |
| TWIST1 |  |  |
| BDKRB2 |  |  |
| GP6 |  |  |
| FABP3 |  |  |
| APOC2 |  |  |
| LPAR2 |  |  |
| BSG |  |  |
| MGAT2 |  |  |
| CYP2J2 |  |  |
| ELK1 |  |  |
| IL23R |  |  |
| UCP1 |  |  |
| STMN1 |  |  |
| MTTP |  |  |
| LIPC |  |  |
| C3AR1 |  |  |
| GJA4 |  |  |
| BATF |  |  |
| APOC3 |  |  |
| LTBP1 |  |  |
| BCAR1 |  |  |
| ADH1B |  |  |
| HFE |  |  |
| EEF1A1 |  |  |
| SPINT2 |  |  |
| SIRPA |  |  |
| IGFBP1 |  |  |
| PLTP |  |  |
| NRP2 |  |  |
| TNFRSF25 |  |  |
| KPNA4 |  |  |
| TJP1 |  |  |
| IREB2 |  |  |
| IGFBP2 |  |  |
| OSM |  |  |
| THBS4 |  |  |
| LPP |  |  |
| GTF2I |  |  |
| CCNG1 |  |  |
| CHGA |  |  |
| CHIA |  |  |
| MT2A |  |  |
| CALD1 |  |  |
| KPNA1 |  |  |
| TG |  |  |
| CAP1 |  |  |
| GCLM |  |  |
| BACH1 |  |  |
| CD84 |  |  |
| SDCCAG8 |  |  |
| ENAH |  |  |
| UTS2 |  |  |
| ADD2 |  |  |
| CALB2 |  |  |
| GOLGA2 |  |  |
| FFAR2 |  |  |
| MCAM |  |  |
| ACYP2 |  |  |
| GADD45G |  |  |
| FMOD |  |  |
| DKK3 |  |  |
| CCL28 |  |  |
| PDLIM1 |  |  |
| SV2B |  |  |
| TLR10 |  |  |
| MT1A |  |  |
| WDR26 |  |  |
| UTRN |  |  |
| VTCN1 |  |  |
| CARD8 |  |  |
| CCL25 |  |  |
| FIS1 |  |  |
| LRG1 |  |  |
| FCN1 |  |  |
| AIF1 |  |  |
| CRLS1 |  |  |
| IL18BP |  |  |
| IL22RA1 |  |  |
| NLRC5 |  |  |
| NPRL2 |  |  |
| TNS1 |  |  |
| C1QTNF3 |  |  |
| APOBEC2 |  |  |
| RGS1 |  |  |
| GPRC5B |  |  |
| SSBP3 |  |  |
| UBE2W |  |  |
| FFAR3 |  |  |
| ACKR2 |  |  |
| CLEC4A |  |  |
| CPEB4 |  |  |
| PDLIM2 |  |  |
| IBSP |  |  |
| PTER |  |  |
| APOL3 |  |  |
| MPP7 |  |  |
| CST2 |  |  |
| POMGNT2 |  |  |
| WDR73 |  |  |
| FCRLB |  |  |
| FCAMR |  |  |
| MYCT1 |  |  |
| LGALSL |  |  |
| ZFYVE28 |  |  |
| HECW1 |  |  |
| ATP5PO |  |  |
| ZNF543 |  |  |
| FABP12 |  |  |
| MT-ATP6 |  |  |
| VWCE |  |  |
| FDCSP |  |  |
| IGHA2 |  |  |
| MIR133B |  |  |
| MIR200B |  |  |
| SSPOP |  |  |
| MIR216A |  |  |
| MIR378A |  |  |
| MIR183 |  |  |
| MIR186 |  |  |
| MIR193A |  |  |
| MIR199A1 |  |  |
| MIR103A2 |  |  |
| MIR133A1 |  |  |
| MIR103A1 |  |  |
| MIR374A |  |  |
| IGKV3-20 |  |  |
| MIR382 |  |  |
| MIR1207 |  |  |
| MT-RNR1 |  |  |
| RNY5 |  |  |
| RNR1 |  |  |
| ST2 |  |  |
| IGES |  |  |
| LEPQTL1 |  |  |
| LOC117600004 |  |  |
| FGFR4 |  |  |
| GLA |  |  |
| ODC1 |  |  |
| FBLN1 |  |  |
| KIR2DS4 |  |  |
| KIR2DS5 |  |  |
| CD2-LCR |  |  |
| VDR |  |  |
| PTPN6 |  |  |
| NR4A1 |  |  |
| NR4A2 |  |  |
| FPR2 |  |  |
| TCF3 |  |  |
| HSP90B1 |  |  |
| HNF1B |  |  |
| CD209 |  |  |
| RPS27A |  |  |
| PIAS4 |  |  |
| LGALS1 |  |  |
| CD163 |  |  |
| JMJD6 |  |  |
| GAS1 |  |  |
| APCS |  |  |
| IKZF3 |  |  |
| NOX1 |  |  |
| CCL1 |  |  |
| AR |  |  |
| ABL1 |  |  |
| NFKB2 |  |  |
| CDKN2A |  |  |
| MMP14 |  |  |
| CSNK2A1 |  |  |
| NFKBIA |  |  |
| RELA |  |  |
| FYN |  |  |
| IRAK4 |  |  |
| TNC |  |  |
| ACP5 |  |  |
| MALT1 |  |  |
| APAF1 |  |  |
| COL3A1 |  |  |
| CSNK2A2 |  |  |
| PIN1 |  |  |
| TRAF3 |  |  |
| TRAF6 |  |  |
| PIK3CB |  |  |
| PDXK |  |  |
| PPARD |  |  |
| BAD |  |  |
| MAP3K11 |  |  |
| BIRC3 |  |  |
| MYH10 |  |  |
| PRDX5 |  |  |
| PTGER4 |  |  |
| KAT5 |  |  |
| ATF2 |  |  |
| FBN1 |  |  |
| ANG |  |  |
| FLNB |  |  |
| SEMA3A |  |  |
| IL6ST |  |  |
| MYH6 |  |  |
| FKBP4 |  |  |
| FZD10 |  |  |
| CYB5R3 |  |  |
| CBLB |  |  |
| HLA-G |  |  |
| MKI67 |  |  |
| IL12A |  |  |
| IL12B |  |  |
| SERPINB2 |  |  |
| TNFRSF9 |  |  |
| LGALS3 |  |  |
| KNG1 |  |  |
| TFF1 |  |  |
| SPHK2 |  |  |
| TRAP1 |  |  |
| P2RX4 |  |  |
| ETS2 |  |  |
| CDKN3 |  |  |
| COPS5 |  |  |
| COL14A1 |  |  |
| DNTT |  |  |
| TNFRSF18 |  |  |
| TNFRSF8 |  |  |
| THPO |  |  |
| AGK |  |  |
| COQ2 |  |  |
| IRAK2 |  |  |
| JUNB |  |  |
| TFF2 |  |  |
| TFPI2 |  |  |
| EDN2 |  |  |
| PCSK6 |  |  |
| SH2D2A |  |  |
| SRP72 |  |  |
| IAPP |  |  |
| CD177 |  |  |
| ARID3A |  |  |
| FAT1 |  |  |
| OXA1L |  |  |
| SMOX |  |  |
| DNASE2 |  |  |
| TFDP2 |  |  |
| DSG3 |  |  |
| C1D |  |  |
| CCDC50 |  |  |
| POU2AF1 |  |  |
| TNFSF9 |  |  |
| LECT2 |  |  |
| GZF1 |  |  |
| NPY4R |  |  |
| TMSB10 |  |  |
| HILPDA |  |  |
| POC5 |  |  |
| MT-ND1 |  |  |
| IGKC |  |  |
| KRBOX4 |  |  |
| HLA-S |  |  |
| CLCNKB |  |  |
| DDIT1 |  |  |
| RC3H1 |  |  |
| TROVE2 |  |  |
| PSEN2 |  |  |
| MGAT5 |  |  |
| SMARCAL1 |  |  |
| FGFR3 |  |  |
| GPA |  |  |
| IFNGR1 |  |  |
| KHDRBS3 |  |  |
| C1NH |  |  |
| CD9 |  |  |
| NCKAP1L |  |  |
| LYZ |  |  |
| HAL |  |  |
| BRCA2 |  |  |
| PSEN1 |  |  |
| MFGE8 |  |  |
| PLCG2 |  |  |
| IFNAR2 |  |  |
| CRFB4 |  |  |
| CBS |  |  |
| TOP3B |  |  |
| CYBB |  |  |
| GPC3 |  |  |

Table S4 MCODE App Results

| Cluster | Score | Nodes | Edges | Node IDs | |
| --- | --- | --- | --- | --- | --- |
| 1 | 41.882 | 52 | 1068 | NFKBIA, IL10, HMOX1, MAPK1, PTGS2, CDKN1A, RELA, VEGFA, SPP1, AR, CASP3, PLAU, MMP9, TP53, PTEN, JUN, CD40LG, FOS, FASLG, TNF, IL6, STAT1, AKT1, NOS3, CASP8, PPARG, EGFR, HSP90AA1, EGF, ICAM1, SELE, IL1B, NOS2, MMP1, CXCL8, CXCL10, MMP3, VCAM1, CRP, IL4, MAPK14, IFNG, CCND1, IL2, MYC, CCL2, HIF1A, MPO, SERPINE1, TGFB1, MMP2, CDKN2A | |
| 2 | 3 | 3 | 3 | COL1A1, GJA1, RB1 |  |
| 3 | 2.8 | 6 | 7 | CDK4, IL1A, CDK2, PARP1, CXCL2, IRF1 | |
